# Supplementary material for: Comparison between diffusion MRI tractography and histological tract-tracing of cortico-cortical structural connectivity in the ferret brain
Source: PubMed Central journal article supplement (PMC6777980; doi:10.1162/netn_a_00098), 2019-09-01
Supplement: netn-03-1038-s002.pdf [file netn-03-1038-s002.pdf]

1 **Supplementary**

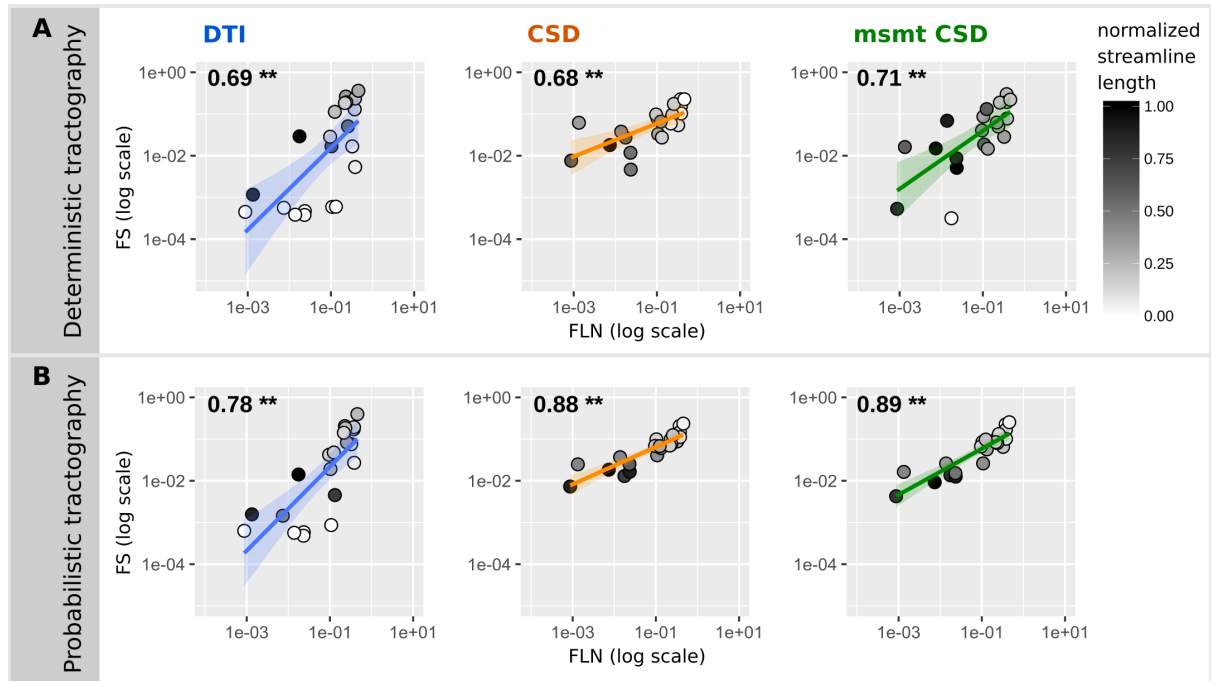

2  
3 **Supplementary figure 1: Pearson's correlation between diffusion MRI tractography and**  
4 **tract-tracing experiments (symmetrical matrix).** Scatterplots of the ranked fraction of  
5 neurons vs. the ranked fraction of streamlines for deterministic (A) and the probabilistic (B)  
6 tractography. Grey colors code for the average streamline length (values normalized by the  
7 maximum streamline length of all the algorithms). P-values inferior to  $1.10^{-3}$  are indicated by  
8 \*\* and p-values inferior to 0.05 by \*.

9

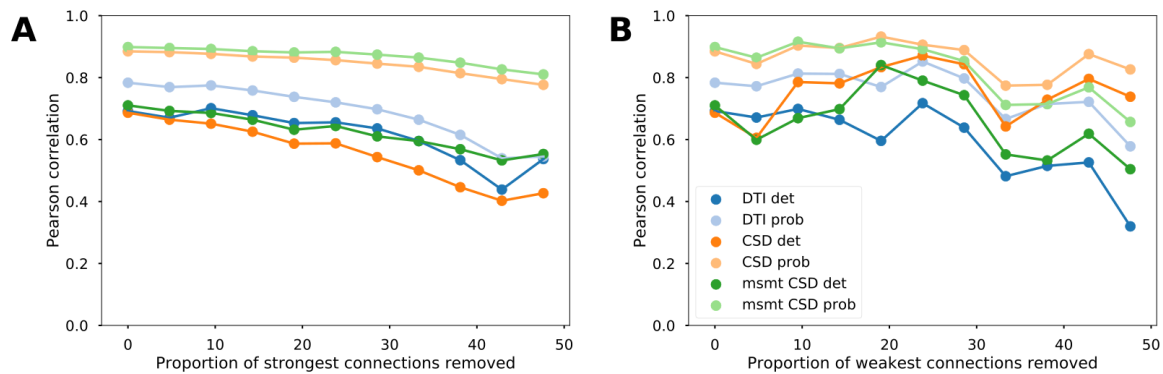

11 **Supplementary figure 2: Reliability of the association between diffusion MRI**  
 12 **tractography and tract-tracing data (symmetrical matrix).** Evolution of the Pearson  
 13 correlation values between tract-tracing and diffusion MRI tractography data as a function of  
 14 the proportion of removed strong (A) and weak (B) connections for the different tractography  
 15 models.

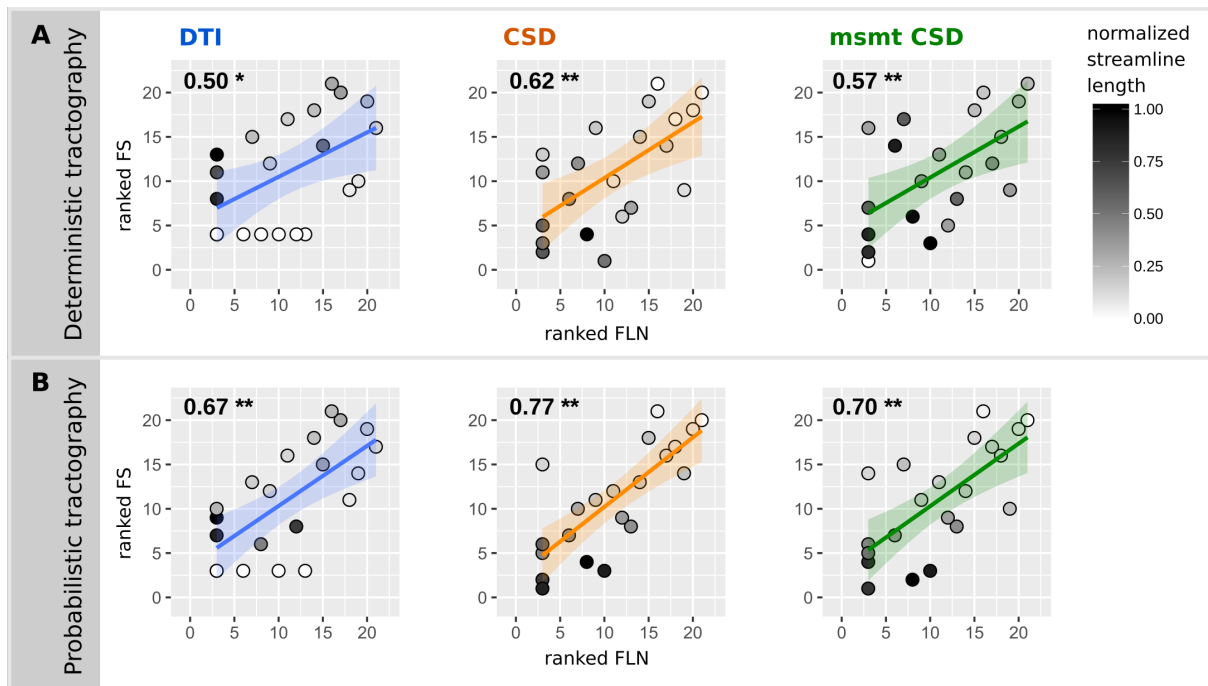

16  
 17 **Supplementary figure 3: Spearman's correlation between diffusion MRI tractography**  
 18 **and tract-tracing experiments (directed matrix).** Scatterplots of the ranked fraction of  
 19 neurons vs. the ranked fraction of streamlines for deterministic (A) and the probabilistic (B)  
 20 tractography. Grey colors code for the average streamline length (values normalized by the  
 21 maximum streamline length of all the algorithms). P-values inferior to  $1.10^{-3}$  are indicated by  
 22 \*\* and p-values inferior to 0.05 by \*.

23  
 24

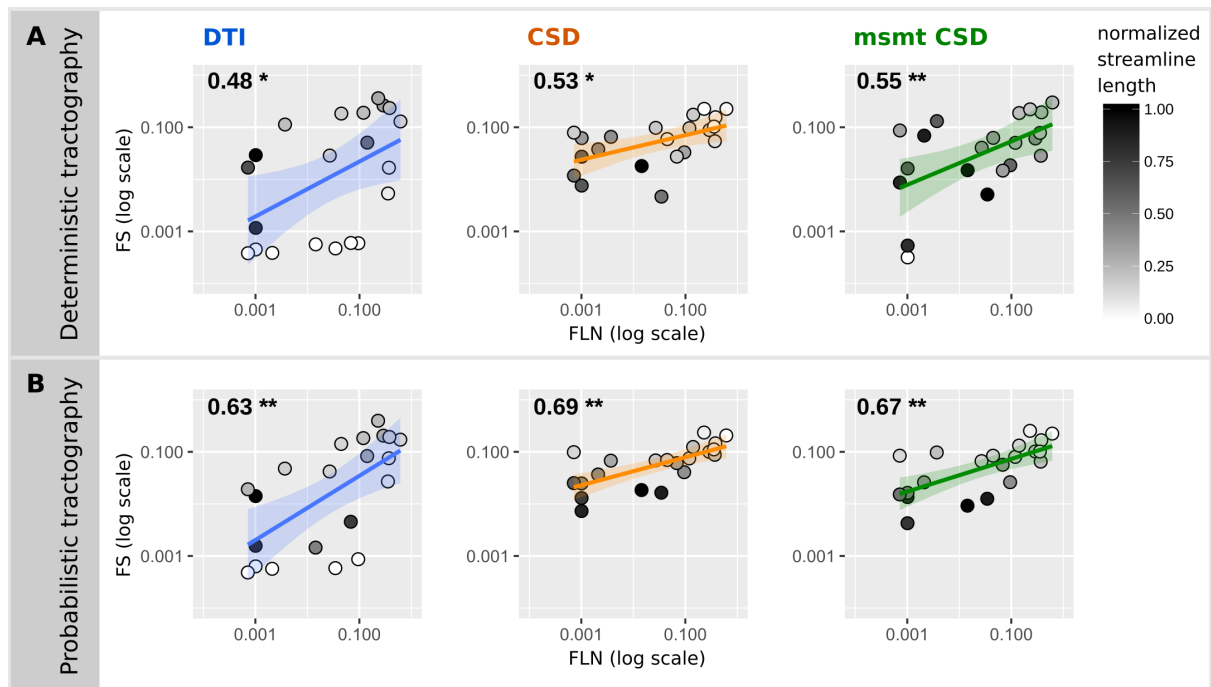

25

26 **Supplementary figure 4: Pearson's correlation between diffusion MRI tractography and**

27 **tract-tracing experiments (directed matrix).** Scatterplots of the ranked fraction of neurons

28 vs. the ranked fraction of streamlines for deterministic (A) and the probabilistic (B)

29 tractography. Grey colors code for the average streamline length (values normalized by the

30 maximum streamline length of all the algorithms). P-values inferior to  $1.10^{-3}$  are indicated by

31 \*\* and p-values inferior to 0.05 by \*.

32

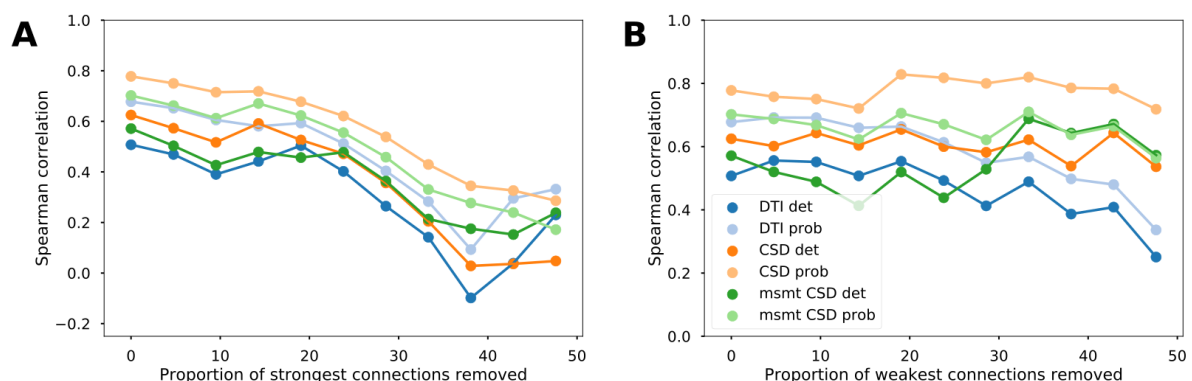

33

34 **Supplementary figure 5: Reliability of the association between diffusion MRI**

35 **tractography and tract-tracing data (directed matrix).** Evolution of the Spearman

36 correlation values between tract-tracing and diffusion MRI tractography data as a function of  
 37 the proportion of removed strong (A) and weak (B) connections for the different tractography  
 38 models.  
 39

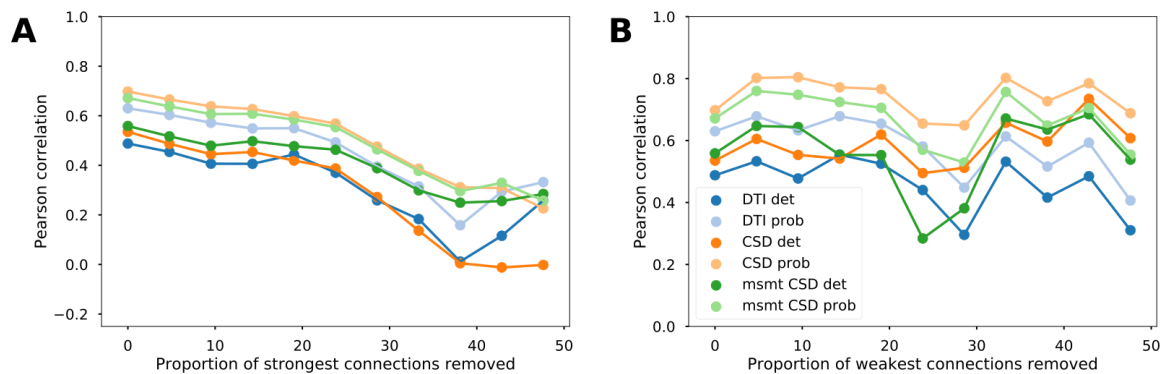

40  
 41 **Supplementary figure 6: Reliability of the association between diffusion MRI**  
 42 **tractography and tract-tracing data (directed matrix).** Evolution of the Pearson correlation  
 43 values between tract-tracing and diffusion MRI tractography data as a function of the  
 44 proportion of removed strong (A) and weak (B) connections for the different tractography  
 45 models.  
 46

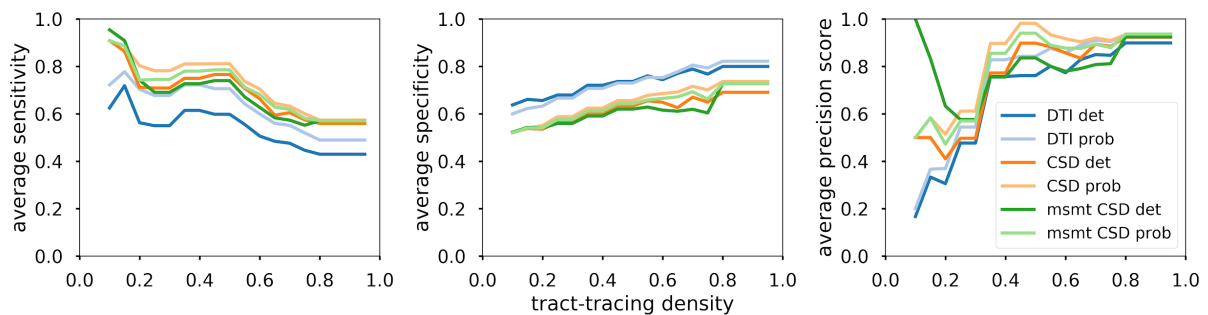

47  
 48 **Supplementary figure 7: Average sensitivity (A), average specificity (B) and average**  
 49 **precision score (C) along tract-tracing density (directed matrix).**  
 50

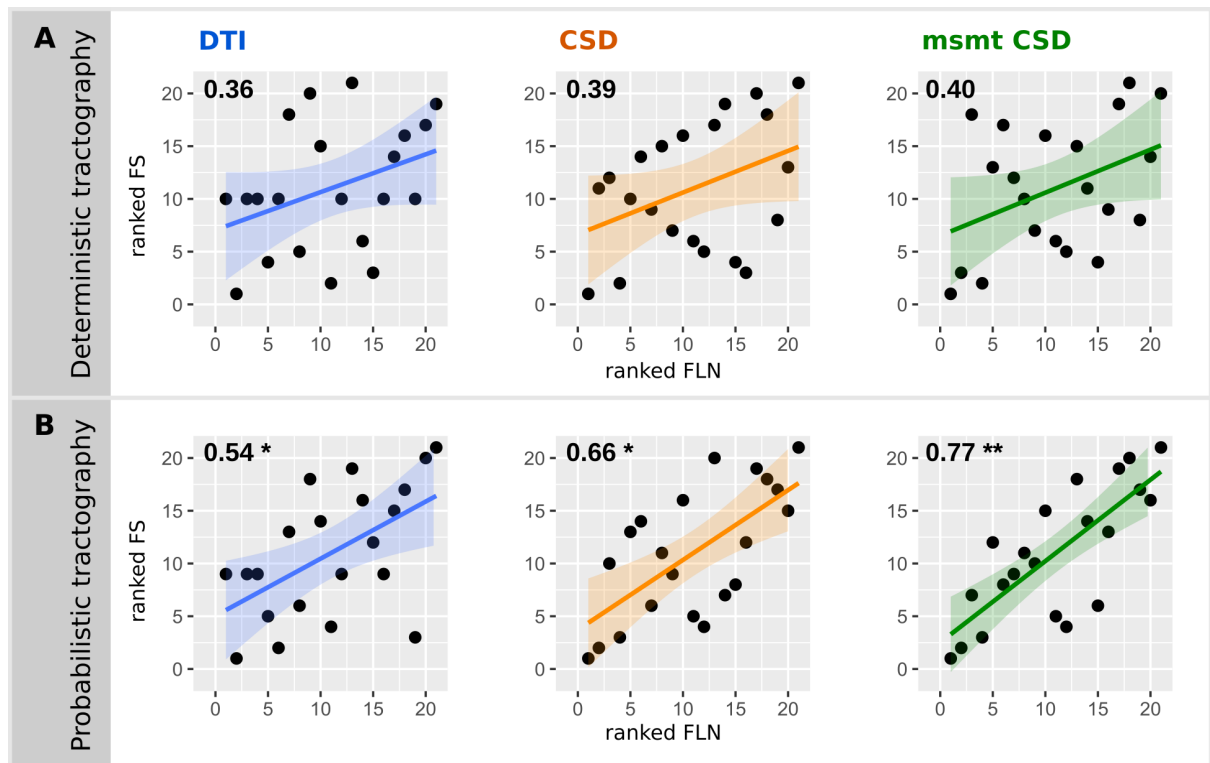

51

52 **Supplementary figure 8: Spearman's partial correlation between diffusion MRI**

53 **tractography and tract-tracing experiments (symmetrical matrix).** Scatterplots of the

54 ranked residuals FLN after regressing out the euclidean distance between each pair of areas vs.

55 the ranked residuals FS for deterministic (A) and the probabilistic (B) tractography. P-values

56 inferior to  $1.10^{-3}$  are indicated by \*\* and p-values inferior to 0.05 by \*.

57

|               |          | Undirected tract-tracing matrix |         | Directed tract-tracing matrix |         |
|---------------|----------|---------------------------------|---------|-------------------------------|---------|
|               |          | Spearman                        | Pearson | Spearman                      | Pearson |
| Deterministic | DTI      | 0.36                            | 0.56 *  | 0.38                          | 0.3     |
|               | CSD      | 0.39                            | 0.44 *  | 0.35                          | 0.23    |
|               | msmt CSD | 0.4                             | 0.50 *  | 0.39                          | 0.3     |
| Probabilistic | DTI      | 0.54 *                          | 0.66 ** | 0.55 *                        | 0.46 *  |
|               | CSD      | 0.66 *                          | 0.85 ** | 0.67 *                        | 0.53 *  |
|               | msmt CSD | 0.77 **                         | 0.85 ** | 0.77 **                       | 0.48 *  |

58

59 **Supplementary table 1: Partial correlations between diffusion MRI tractography and**

60 **tract-tracing experiments after regressing out the euclidean distance between each pair**

61 **of areas.**

62

63

64 **Supplementary file 1: Number of connections between each pair of areas recovered by**  
65 **diffusion MRI tractography for DTI, CSD and msmt CSD tracked with deterministic and**  
66 **probabilistic tractography.**

67
